# Supplementary figures and images for: Attention-deficit hyperactivity disorder in adults: A systematic review and meta-analysis of genetic, pharmacogenetic and biochemical studies
Source: PubMed Central journal article supplement — Mol Psychiatry. 2016 May 24;21(7):872–84. doi: 10.1038/mp.2016.74 (PMC5414093; doi:10.1038/mp.2016.74), 2016-05-24

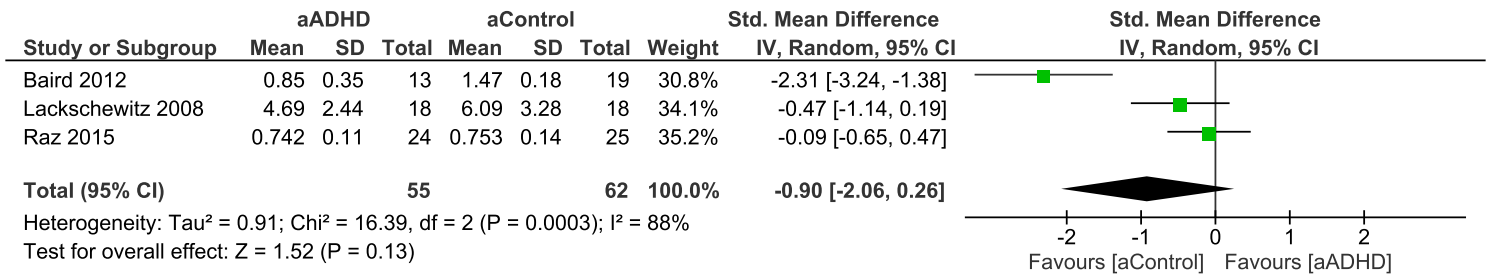

Supplement: mp201674x10.pdf [file mp201674x10.pdf]
